# Supplementary material for: Association between taste receptor (TAS) genes and the perception of wine characteristics
Source: PubMed Central journal article supplement (PMC5569080; doi:10.1038/s41598-017-08946-3), 2017-08-23
Supplement: 41598_2017_8946_MOESM1_ESM.pdf [file 41598_2017_8946_MOESM1_ESM.pdf]

## **Supplementary Tables**

**Title of the manuscript:** Association between taste receptor (TAS) genes and the perception of wine characteristics

**Author list:** Maura Carrai Daniele Campa, Pavel Vodicka, Riccardo Flamini, Irene Martelli, Jana Slyskova, Katerina Jiraskova, Alexandra Rejhova, Sona Vodenkova, Federico Canzian, Alberto Bertelli, Antonio Dalla Vedova, Luigi Bavaresco, Ludmila Vodickova, Roberto Barale

**Supplementary table S1. Association of all the SNPs with PROP sensitivity**

| <b>Variabile indipendente</b> | <b>Livello (se 0 unico livello)</b> | <b>Coef.</b> | <b>P&gt; z </b> | <b>[95% Conf Interval]</b> |
|-------------------------------|-------------------------------------|--------------|-----------------|----------------------------|
| CA6_rs2274333                 | Mm Vs MM                            | -0.020       | 0.923           | (-0,4269009; 0,3868488)    |
| CA6_rs2274333                 | mm Vs MM                            | -0.195       | 0.557           | (-0,8453703; 0,4553909)    |
| GNAT3_rs7792845               | Mm Vs MM                            | 0.166        | 0.346           | (-0,179418; 0,5114185)     |
| GNAT3_rs7792845               | mm Vs MM                            | -0.246       | 0.309           | (-0,7209397; 0,2283362)    |
| TAS1R2_rs35874116             | Mm Vs MM                            | -0.043       | 0.799           | (-0,3736597; 0,2879028)    |
| TAS1R2_rs35874116             | mm Vs MM                            | 0.304        | 0.279           | (-0,246117; 0,8540741)     |
| TAS1R2_rs4920566              | Mm Vs MM                            | 0.155        | 0.466           | (-0,2613635; 0,5704173)    |
| TAS1R2_rs4920566              | mm Vs MM                            | 0.334        | 0.139           | (-0,1083795; 0,7765003)    |
| TAS1R3_rs35744813             | Mm Vs MM                            | 0.070        | 0.249           | (-0,416956; 0,5576089)     |
| TAS2R1_rs2234233              | Mm Vs MM                            | -0.065       | 0.723           | (-0,4260983; 0,2956269)    |
| TAS2R1_rs2234233              | mm Vs MM                            | -0.200       | 0.646           | (-1,051481; 0,651834)      |
| TAS2R1_rs41467                | Mm Vs MM                            | -0.027       | 0.874           | (-0,363959; 0,3094399)     |
| TAS2R1_rs41467                | mm Vs MM                            | 0.124        | 0.601           | (-0,3415453; 0,5901937)    |
| TAS2R14_rs11610105            | Mm Vs MM                            | 0.067        | 0.687           | (-0,2579887; 0,3912677)    |
| TAS2R14_rs11610105            | mm Vs MM                            | 0.246        | 0.454           | (-0,398221; 0,8907656)     |
| TAS2R16_rs6466849             | Mm Vs MM                            | -0.102       | 0.567           | (-0,4529785; 0,248324)     |
| TAS2R16_rs6466849             | mm Vs MM                            | 0.561        | 0.326           | (-0,5591528; 1,681884)     |
| TAS2R16_rs860170              | Mm Vs MM                            | -0.176       | 0.294           | (-0,5050025; 0,1526425)    |
| TAS2R16_rs860170              | mm Vs MM                            | -0.002       | 0.993           | (-0,5431011; 0,5382848)    |
| TAS2R16_rs978739              | Mm Vs MM                            | -0.300       | 0.076           | (-0,6316194; 0,0317195)    |
| TAS2R16_rs978739              | mm Vs MM                            | -0.058       | 0.832           | (-0,5901395; 0,4746832)    |
| TAS2R19_rs12313469            | Mm Vs MM                            | 0.263        | 0.186           | (-0,1269921; 0,6537945)    |
| TAS2R19_rs12313469            | mm Vs MM                            | 0.241        | 0.302           | (-0,2168097; 0,6995747)    |
| TAS2R20_rs10772408            | Mm Vs MM                            | -0.048       | 0.785           | (-0,3908963; 0,2955698)    |
| TAS2R20_rs10772408            | mm Vs MM                            | -0.059       | 0.810           | (-0,5375968; 0,4199933)    |
| TAS2R30_rs2599404             | Mm Vs MM                            | 0.039        | 0.849           | (-0,3617732; 0,4398025)    |
| TAS2R30_rs2599404             | mm Vs MM                            | 0.044        | 0.851           | (-0,4158175; 0,5041729)    |
| TAS2R31_rs10845296            | Mm Vs MM                            | -0.035       | 0.847           | (-0,3933804; 0,3226584)    |
| TAS2R31_rs10845296            | mm Vs MM                            | 0.393        | 0.405           | (-0,532909; 1,319214)      |
| TAS2R38_rs10246939            | Mm Vs MM                            | 0.368        | 0.053           | (-0,0039964; 0,7390507)    |
| TAS2R38_rs10246939            | mm Vs MM                            | 1.710        | 0.000           | (1,296952; 2,124031)       |
| TAS2R38_rs1726866             | Mm Vs MM                            | 0.366        | 0.054           | (-0,005835; 0,7371022)     |
| TAS2R38_rs1726866             | mm Vs MM                            | 1.720        | 0.000           | (1,306599; 2,134023)       |
| TAS2R38_rs713598              | Mm Vs MM                            | 0.358        | 0.079           | (-0,0408327; 0,7560625)    |
| TAS2R38_rs713598              | mm Vs MM                            | 1.633        | 0.000           | (1,210333; 2,055768)       |
| TAS2R39_rs4726600             | Mm Vs MM                            | -0.189       | 0.288           | (-0,5363169; 0,1592148)    |
| TAS2R39_rs4726600             | mm Vs MM                            | 0.145        | 0.684           | (-0,5518018; 0,8411787)    |
| TAS2R40_rs534126              | Mm Vs MM                            | -0.122       | 0.462           | (-0,448158; 0,2037637)     |
| TAS2R40_rs534126              | mm Vs MM                            | 0.075        | 0.785           | (-0,4615715; 0,6107118)    |
| TAS2R41_rs10278721            | Mm Vs MM                            | -0.091       | 0.593           | (-0,4246336; 0,2425518)    |
| TAS2R41_rs10278721            | mm Vs MM                            | -0.465       | 0.103           | (-1,023853; 0,0934816)     |
| TAS2R42_rs5020531             | Mm Vs MM                            | -0.004       | 0.983           | (-0,3424817; 0,3351725)    |

|                   |          |        |       |                         |
|-------------------|----------|--------|-------|-------------------------|
| TAS2R42_rs5020531 | mm Vs MM | 0.096  | 0.708 | (-0,4041749; 0,5955355) |
| TAS2R46_rs2708381 | Mm Vs MM | 0.331  | 0.065 | (-0,0208535; 0,6820387) |
| TAS2R46_rs2708381 | mm Vs MM | -0.127 | 0.757 | (-0,9317792; 0,6775085) |
| TAS2R5_rs2227264  | Mm Vs MM | -0.635 | 0.001 | (-1,021399; -0,2476244) |
| TAS2R5_rs2227264  | mm Vs MM | -0.931 | 0.000 | (-1,363882; -0,4971271) |
| TAS2R50_rs1376251 | Mm Vs MM | -0.039 | 0.824 | (-0,3876064; 0,3087661) |
| TAS2R50_rs1376251 | mm Vs MM | 0.010  | 0.996 | (-0,545409; 0,5427206)  |
| TAS2R50_rs7136962 | Mm Vs MM | 0.203  | 0.228 | (-0,1271773; 0,5340109) |
| TAS2R50_rs7136962 | mm Vs MM | -0.060 | 0.875 | (-0,8096406; 0,6894947) |
| TAS2R60_rs4595035 | Mm Vs MM | 0.046  | 0.788 | (-0,2891064; 0,3811795) |
| TAS2R60_rs4595035 | mm Vs MM | -0.059 | 0.814 | (-0,552465; 0,4340965)  |
| TAS2R7_rs2588350  | Mm Vs MM | 0.207  | 0.259 | (-0,1524614; 0,5659731) |
| TAS2R7_rs2588350  | mm Vs MM | 0.355  | 0.221 | (-0,2140503; 0,9247068) |
| TAS2R9_rs3741845  | Mm Vs MM | 0.116  | 0.524 | (-0,2409942; 0,4732343) |
| TAS2R9_rs3741845  | mm Vs MM | 0.038  | 0.883 | (-0,4726842; 0,5491657) |

**Mn Vs MM defines the analysis of heterozygous versus common homozygous**

**mm Vs MM defines the analysis of rare homozygous versus common homozygous**

Supplementary table S2. Associations between the selected polymorphic variants and wine bitterness.

| Chr.         | Gene           | SNP        | Model       | Czech Republic |                 |                 | Italy          |                |                | Czech Republic and Italy |                 |                  |              |
|--------------|----------------|------------|-------------|----------------|-----------------|-----------------|----------------|----------------|----------------|--------------------------|-----------------|------------------|--------------|
|              |                |            |             | Coef.          | 95% CI          | P-value         | Coef.          | 95% CI         | P-value        | Coef.                    | 95% CI          | P-value          |              |
| <b>Chr.1</b> |                |            |             |                |                 |                 |                |                |                |                          |                 |                  |              |
|              | <i>TAS1R3</i>  | rs35744813 | T/C vs C/C  | -0.29          | (-1.31 ; 0.74)  | 0.52            | -0.72          | (-1.96 ; 0.51) | 0.63           | -0.43                    | (-1.23 ; 0.36)  | 0.41             |              |
|              | <i>CA6</i>     | rs2274333  | G/A vs A/A  | 0.07           | (-0.75 ; 0.89)  | 0.86            | n.a.           | n.a.           | n.a.           | n.a.                     | n.a.            | n.a.             |              |
|              |                |            | G/G vs /A/A | -0.53          | (-1.74 ; 0.68)  | 0.39            | n.a.           | n.a.           | n.a.           | n.a.                     | n.a.            | n.a.             |              |
|              | <i>TAS1R2</i>  | rs4920566  | G/A vs G/G  | 0.40           | (-0.40 ; 1.21)  | 0.33            | n.a.           | n.a.           | n.a.           | n.a.                     | n.a.)           | n.a.             |              |
|              |                |            | A/A vs G/G  | -0.66          | (-1.55 ; 0.22)  | 0.14            | n.a.           | n.a.           | n.a.           | n.a.                     | n.a.            | n.a.             |              |
|              |                |            | rs35874116  | G/A vs A/A     | 0.11            | (-0.60 ; 0.82)  | 0.76           | 0.41           | (-0.42 ; 1.23) | 0.34                     | 0.19            | (-0.35 ; 0.73)   | 0.50         |
|              |                |            |             | G/G vs A/A     | -0.18           | (-1.41 ; 1.06)  | 0.78           | -0.45          | (-1.75 ; 0.84) | 0.49                     | -0.32           | (-1.22 ; 0.58)   | 0.49         |
| <b>Chr.5</b> |                |            |             |                |                 |                 |                |                |                |                          |                 |                  |              |
|              | <i>TAS1R1</i>  | rs41467    | T/G vs G/G  | -0.03          | (-0.76 ; 0.71)  | 0.94            | -0.21          | (-1.00 ; 0.58) | 0.60           | -0.17                    | (-0.70 ; 0.37)  | 0.55             |              |
|              |                |            | T/T vs G/G  | -0.25          | (-1.22 ; 0.73)  | 0.62            | -0.50          | (-1.63 ; 0.64) | 0.39           | -0.38                    | (-1.12 ; 0.36)  | 0.31             |              |
| <b>Chr.7</b> |                |            |             |                |                 |                 |                |                |                |                          |                 |                  |              |
|              | <i>GNAT3</i>   | rs7792845  | G/A vs G/G  | 0.22           | (-0.49 ; 0.94)  | 0.54            | -0.08          | (-0.94 ; 0.77) | 0.85           | 0.16                     | (-0.40 ; 0.71)  | 0.58             |              |
|              |                |            | A/A vs G/G  | 1.19           | (-0.03 ; 2.40)  | 0.06            | -0.87          | (-1.88 ; 0.13) | 0.09           | -0.14                    | (-0.90 ; 0.63)  | 0.73             |              |
|              | <i>TAS2R16</i> | rs6466849  | A/G vs G/G  | 0.33           | (-0.40 ; 1.05)  | 0.38            | -0.51          | (-1.35 ; 0.33) | 0.23           | -0.05                    | (-0.61 ; 0.50)  | 0.85             |              |
|              |                |            | A/A vs G/G  | -0.01          | (-1.88 ; 1.86)  | 0.99            | -3.81          | (-9.22 ; 1.61) | 0.17           | -0.53                    | (-2.30 ; 1.24)  | 0.56             |              |
|              |                |            | rs860170    | G/A vs /A/A    | -0.34           | (-1.06 ; 0.39)  | 0.36           | 0.39           | (-0.39 ; 1.17) | 0.33                     | 0.06            | (-0.47 ; 0.6)    | 0.82         |
|              |                |            |             | G/G vs A/A     | 0.06            | (-0.98 ; 1.10)  | 0.91           | 0.81           | (-0.72 ; 2.34) | 0.30                     | 0.38            | (-0.49 ; 1.24)   | 0.40         |
|              | rs978739       | G/A vs A/A | 0.11        | (-0.60 ; 0.82) | 0.76            | -0.13           | (-0.92 ; 0.65) | 0.74           | -0.04          | (-0.57 ; 0.48)           | 0.87            |                  |              |
|              |                | G/G vs A/A | 0.42        | (-0.64 ; 1.48) | 0.44            | 0.24            | (-1.17 ; 1.64) | 0.74           | 0.38           | (-0.46 ; 1.22)           | 0.38            |                  |              |
|              | <i>TAS2R5</i>  | rs2227264  | T/G vs G/G  | -0.53          | (-1.36 ; 0.30)  | 0.21            | 0.89           | (-0.03 ; 1.82) | 0.06           | 0.10                     | (-0.53 ; 0.73)  | 0.75             |              |
|              |                |            | T/T vs G/G  | -0.08          | (-1.00 ; 0.83)  | 0.86            | 0.46           | (-0.59 ; 1.52) | 0.39           | 0.21                     | (-0.49 ; 0.91)  | 0.56             |              |
|              | <i>TAS2R38</i> | rs10246939 | C/T vs C/C  | -0.90          | (-1.78 ; -0.01) | 0.05            | -0.06          | (-0.96 ; 0.84) | 0.90           | -0.54                    | (-1.17 ; 0.09)  | 0.10             |              |
|              |                |            | T/T vs C/C  | -1.12          | (-2.11 ; -0.14) | 0.03            | -0.97          | (-1.96 ; 0.02) | 0.06           | -1.08                    | (-1.78 ; -0.38) | <b>0.003</b>     |              |
|              |                |            | rs1726866   | T/C vs C/C     | -1.06           | (-1.94 ; -0.19) | 0.02           | -0.07          | (-0.97 ; 0.83) | 0.89                     | -0.63           | (-1.27 ; -0.001) | 0.05         |
|              |                |            |             | T/C vs C/C     | -1.16           | (-2.13 ; -0.18) | 0.02           | -0.94          | (-1.94 ; 0.05) | 0.06                     | -1.10           | (-1.80 ; -0.40)  | <b>0.002</b> |
|              | rs713598       | G/C vs C/C | -0.71       | (-1.67 ; 0.26) | 0.15            | 0.08            | (-0.87 ; 1.03) | 0.87           | -0.34          | (-1.02 ; 0.34)           | 0.33            |                  |              |
|              |                | G/G vs C/C | -0.91       | (-1.93 ; 0.10) | 0.08            | -0.51           | (-1.51 ; 0.50) | 0.32           | -0.75          | (-1.46 ; -0.03)          | 0.04            |                  |              |
|              | <i>TAS2R39</i> | rs4726600  | G/A vs G/G  | -0.08          | (-0.78 ; 0.62)  | 0.82            | 0.14           | (-0.75 ; 1.03) | 0.76           | 0.00                     | (-0.56 ; 0.55)  | 0.99             |              |
|              |                |            | A/A vs G/G  | -0.87          | (-2.30 ; 0.56)  | 0.23            | -0.64          | (-2.36 ; 1.08) | 0.47           | -0.66                    | (-1.76 ; 0.45)  | 0.24             |              |
|              | <i>TAS2R40</i> | rs534126   | T/C vs C/C  | -0.54          | (-1.23 ; 0.14)  | 0.12            | -0.31          | (-1.09 ; 0.48) | 0.45           | -0.46                    | (-0.98 ; 0.06)  | 0.08             |              |
|              |                |            | T/T vs C/C  | 0.51           | (-0.74 ; 1.75)  | 0.43            | -0.32          | (-1.50 ; 0.85) | 0.59           | 0.04                     | (-0.81 ; 0.90)  | 0.92             |              |
|              | <i>TAS2R60</i> | rs4595035  | T/C vs C/C  | -0.06          | (-0.77 ; 0.65)  | 0.88            | -0.16          | (-0.95 ; 0.63) | 0.69           | -0.05                    | (-0.59 ; 0.48)  | 0.84             |              |
|              |                |            | T/T vs C/C  | -0.41          | (-1.49 ; 0.66)  | 0.45            | -0.50          | (-1.65 ; 0.65) | 0.39           | -0.42                    | (-1.21 ; 0.37)  | 0.30             |              |

|                |            |                          |                |                                  |              |                |                                   |              |                |                                  |              |
|----------------|------------|--------------------------|----------------|----------------------------------|--------------|----------------|-----------------------------------|--------------|----------------|----------------------------------|--------------|
| <i>TAS2R41</i> | rs10278721 | T/C vs C/C<br>T/T vs C/C | 0.33<br>-0.13  | (-0.36 ; 1.03)<br>(-1.45 ; 1.18) | 0.34<br>0.84 | -0.07<br>0.39  | (-0.89 ; 0.75)<br>(-0.80 ; 1.58)  | 0.87<br>0.52 | 0.16<br>0.15   | (-0.38 ; 0.69)<br>(-0.74 ; 1.03) | 0.56<br>0.75 |
| <b>Chr.12</b>  |            |                          |                |                                  |              |                |                                   |              |                |                                  |              |
| <i>TAS2R7</i>  | rs2588350  | G/A vs G/G<br>A/A vs G/G | 0.32<br>0.30   | (-0.38 ; 1.02)<br>(-1.15 ; 1.76) | 0.38<br>0.68 | 0.89<br>0.55   | (-0.11 ; 1.89)<br>(-0.66 ; 1.75)  | 0.08<br>0.38 | 0.54<br>0.43   | (-0.04 ; 1.12)<br>(-0.48 ; 1.35) | 0.07<br>0.35 |
| <i>TAS2R9</i>  | rs3741845  | T/C vs C/C<br>T/T vs C/C | -0.13<br>0.05  | (-0.87 ; 0.60)<br>(-0.91 ; 1.02) | 0.72<br>0.92 | 0.45<br>0.30   | (-0.42 ; 1.31)<br>(-1.16 ; 1.77)  | 0.31<br>0.69 | 0.12<br>0.10   | (-0.45 ; 0.68)<br>(-0.71 ; 0.91) | 0.69<br>0.81 |
| <i>TAS2R14</i> | rs11610105 | G/A vs G/G<br>A/A vs G/G | 0.49<br>0.01   | (-0.20 ; 1.17)<br>(-1.38 ; 1.41) | 0.16<br>0.99 | -0.56<br>0.15  | (-1.35 ; 0.22)<br>(-1.33 ; 1.64)  | 0.16<br>0.84 | 0.06<br>-0.05  | (-0.46 ; 0.58)<br>(-1.07 ; 0.98) | 0.82<br>0.93 |
| <i>TAS2R50</i> | rs1376251  | T/C vs C/C<br>T/T vs C/C | 0.74<br>-0.74  | (0.05 ; 1.42)<br>(-1.96 ; 0.48)  | 0.04<br>0.23 | 0.47<br>0.89   | (-0.42 ; 1.36)<br>(-0.30 ; 2.08)  | 0.30<br>0.14 | 0.69<br>0.16   | (0.15 ; 1.24)<br>(-0.69 ; 1.01)  | 0.01<br>0.71 |
|                | rs7136962  | T/C vs T/T<br>C/C vs T/T | 0.40<br>0.04   | (-0.29 ; 1.09)<br>(-1.42 ; 1.50) | 0.26<br>0.96 | -0.13<br>0.57  | (-0.94 ; 0.67)<br>(-1.43 ; 2.56)  | 0.74<br>0.58 | 0.17<br>0.14   | (-0.36 ; 0.70)<br>(-1.05 ; 1.33) | 0.53<br>0.82 |
| <i>TAS2R20</i> | rs10772408 | G/A vs G/G<br>A/A vs G/G | -0.28<br>-0.33 | (-1.02 ; 0.46)<br>(-1.35 ; 0.68) | 0.45<br>0.52 | -0.57<br>-0.62 | (-1.36 ; 0.21)<br>(-1.77 ; 0.54)  | 0.15<br>0.30 | -0.44<br>-0.47 | (-0.98 ; 0.10)<br>(-1.24 ; 0.29) | 0.11<br>0.23 |
| <i>TAS2R19</i> | rs12313469 | G/A vs G/G<br>A/A vs G/G | 0.65<br>0.14   | (-0.26 ; 1.57)<br>(-0.89 ; 1.17) | 0.16<br>0.79 | -1.13<br>-0.98 | (-1.97 ; -0.29)<br>(-2.04 ; 0.08) | 0.01<br>0.07 | -0.30<br>-0.62 | (-0.93 ; 0.32)<br>(-1.36 ; 0.11) | 0.35<br>0.10 |
| <i>TAS2R31</i> | rs10845296 | T/C vs T/T<br>C/C vs T/T | 0.07<br>-1.20  | (-0.69 ; 0.82)<br>(-3.92 ; 1.52) | 0.86<br>0.39 | 0.30<br>0.36   | (-0.58 ; 1.18)<br>(-1.50 ; 2.22)  | 0.50<br>0.71 | 0.19<br>-0.03  | (-0.38 ; 0.77)<br>(-1.56 ; 1.49) | 0.51<br>0.97 |
| <i>TAS2R46</i> | rs2708381  | G/A vs G/G<br>A/A vs G/G | 0.45<br>-0.15  | (-0.31 ; 1.22)<br>(-1.77 ; 1.47) | 0.25<br>0.86 | -0.01<br>-0.09 | (-0.81 ; 0.79)<br>(-2.08 ; 1.90)  | 0.98<br>0.93 | 0.23<br>-0.22  | (-0.33 ; 0.78)<br>(-1.48 ; 1.04) | 0.42<br>0.74 |
| <i>TAS2R30</i> | rs2599404  | T/G vs T/T<br>G/G vs T/T | 0.70<br>0.30   | (-0.19 ; 1.59)<br>(-0.70 ; 1.30) | 0.12<br>0.55 | -0.67<br>-0.77 | (-1.58 ; 0.25)<br>(-1.86 ; 0.33)  | 0.16<br>0.17 | 0.04<br>-0.32  | (-0.60 ; 0.67)<br>(-1.05 ; 0.42) | 0.91<br>0.40 |
| <i>TAS2R42</i> | rs5020531  | T/C vs C/C<br>T/C vs C/C | 0.08<br>-0.21  | (-0.66 ; 0.81)<br>(-1.21 ; 0.80) | 0.84<br>0.69 | 0.00<br>0.05   | (-0.81 ; 0.81)<br>(-1.27 ; 1.36)  | 1.00<br>0.94 | 0.12<br>-0.14  | (-0.42 ; 0.67)<br>(-0.94 ; 0.66) | 0.66<br>0.73 |

**Supplementary table S3. Associations between the selected polymorphic variants and wine sourness.**

| Chr.         | Gene           | SNP      | Model       | Czech Republic |                |         | Italy |                |         | Czech Republic and Italy |                |         |
|--------------|----------------|----------|-------------|----------------|----------------|---------|-------|----------------|---------|--------------------------|----------------|---------|
|              |                |          |             | Coef.          | 95% CI         | P-value | Coef. | 95% CI         | P-value | Coef.                    | 95% CI         | P-value |
| <b>Chr.1</b> |                |          |             |                |                |         |       |                |         |                          |                |         |
|              | <i>TAS1R3</i>  | rs357448 | T/C vs C/C  | 0.31           | (-0.70 ; 1.31) | 0.51    | -0.41 | (-1.50 ; 0.68) | 0.56    | 0.00                     | (0.73 ; 0.74)  | 0.38    |
|              | <i>CA6</i>     | rs227433 | G/A vs A/A  | 0.48           | (-0.34 ; 1.30) | 0.25    | n.a.  | n.a.           | n.a.    | n.a.                     | n.a.           | n.a.    |
|              |                |          | G/G vs /A/A | -0.20          | (-1.44 ; 1.03) | 0.75    | n.a.  | n.a.           | n.a.    | n.a.                     | n.a.           | n.a.    |
|              | <i>TAS1R2</i>  | rs492056 | G/A vs G/G  | 0.17           | (-0.63 ; 0.98) | 0.68    | n.a.  | n.a.           | n.a.    | n.a.                     | n.a.           | n.a.    |
|              |                |          | A/A vs G/G  | -0.27          | (-1.16 ; 0.61) | 0.55    | n.a.  | n.a.           | n.a.    | n.a.                     | n.a.           | n.a.    |
|              |                | rs358741 | G/A vs A/A  | -0.28          | (-0.97 ; 0.42) | 0.44    | -0.44 | (-1.16 ; 0.28) | 0.23    | -0.37                    | (-0.87 ; 0.13) | 0.15    |
|              |                |          | G/G vs A/A  | 0.73           | (-0.48 ; 1.93) | 0.24    | -0.85 | (-1.97 ; 0.28) | 0.14    | -0.04                    | (-0.87 ; 0.78) | 0.92    |
| <b>Chr.5</b> |                |          |             |                |                |         |       |                |         |                          |                |         |
|              | <i>TAS1R1</i>  | rs41467  | T/G vs G/G  | -0.27          | (-0.99 ; 0.46) | 0.47    | -0.23 | (-0.93 ; 0.48) | 0.53    | -0.26                    | (-0.77 ; 0.24) | 0.30    |
|              |                |          | T/T vs G/G  | -0.81          | (-1.76 ; 0.15) | 0.10    | 0.05  | (-0.97 ; 1.06) | 0.93    | -0.46                    | (-1.16 ; 0.23) | 0.19    |
| <b>Chr.7</b> |                |          |             |                |                |         |       |                |         |                          |                |         |
|              | <i>GNAT3</i>   | rs779284 | G/A vs G/G  | 0.29           | (-0.42 ; 0.99) | 0.42    | -0.43 | (-1.20 ; 0.34) | 0.28    | 0.02                     | (-0.50 ; 0.54) | 0.95    |
|              |                |          | A/A vs G/G  | 0.64           | (-0.56 ; 1.84) | 0.30    | -0.47 | (-1.38 ; 0.43) | 0.30    | 0.02                     | (-0.69 ; 0.73) | 0.95    |
|              | <i>TAS2R16</i> | rs646684 | A/G vs G/G  | 1.20           | (0.50 ; 1.91)  | 0.001   | 0.61  | (-0.14 ; 1.35) | 0.11    | 0.94                     | (0.43 ; 1.46)  | 0.0003  |
|              |                |          | A/A vs G/G  | -0.75          | (-2.56 ; 1.05) | 0.41    | -5.11 | (-9.93 ; 0.28) | 0.04    | -1.30                    | (-2.94 ; 0.34) | 0.12    |
|              |                | rs860170 | G/A vs /A/A | 0.10           | (-0.61 ; 0.82) | 0.78    | 0.07  | (-0.61 ; 0.75) | 0.84    | 0.10                     | (-0.39 ; 0.60) | 0.68    |
|              |                |          | G/G vs A/A  | 0.24           | (-0.80 ; 1.27) | 0.65    | 0.25  | (-1.08 ; 1.58) | 0.71    | 0.24                     | (-0.56 ; 1.05) | 0.55    |
|              |                | rs978739 | G/A vs A/A  | 0.29           | (-0.41 ; 0.99) | 0.42    | 0.59  | (-0.12 ; 1.29) | 0.10    | 0.40                     | (-0.09 ; 0.90) | 0.11    |
|              |                |          | G/G vs A/A  | 0.46           | (-0.59 ; 1.50) | 0.39    | 0.17  | (-1.09 ; 1.42) | 0.80    | 0.40                     | (-0.39 ; 1.19) | 0.33    |
|              | <i>TAS2R5</i>  | rs222726 | T/G vs G/G  | -0.52          | (-1.35 ; 0.32) | 0.22    | 0.28  | (-0.56 ; 1.11) | 0.52    | -0.17                    | (-0.76 ; 0.43) | 0.58    |
|              |                |          | T/T vs G/G  | -0.90          | (-1.82 ; 0.02) | 0.06    | -0.04 | (-0.99 ; 0.91) | 0.93    | -0.49                    | (-1.15 ; 0.17) | 0.15    |
|              | <i>TAS2R38</i> | rs102469 | C/T vs C/C  | 0.49           | (-0.39 ; 1.37) | 0.27    | 0.60  | (-0.21 ; 1.40) | 0.15    | 0.50                     | (-0.10 ; 1.10) | 0.10    |
|              |                |          | T/T vs C/C  | 0.64           | (-0.34 ; 1.62) | 0.20    | -0.02 | (-0.91 ; 0.87) | 0.96    | 0.30                     | (-0.36 ; 0.96) | 0.37    |
|              |                | rs172686 | T/C vs C/C  | 0.42           | (-0.46 ; 1.31) | 0.35    | 0.59  | (-0.21 ; 1.40) | 0.15    | 0.46                     | (-0.14 ; 1.06) | 0.13    |
|              |                |          | T/C vs C/C  | 0.59           | (-0.39 ; 1.58) | 0.24    | -0.03 | (-0.92 ; 0.86) | 0.94    | 0.27                     | (-0.40 ; 0.93) | 0.43    |
|              |                | rs713598 | G/C vs C/C  | -0.08          | (-1.03 ; 0.87) | 0.87    | 0.13  | (-0.72 ; 0.98) | 0.76    | -0.02                    | (-0.66 ; 0.62) | 0.95    |
|              |                |          | G/G vs C/C  | 0.56           | (-0.45 ; 1.57) | 0.28    | -0.07 | (-0.97 ; 0.82) | 0.87    | 0.24                     | (-0.44 ; 0.91) | 0.49    |
|              | <i>TAS2R39</i> | rs472660 | G/A vs G/G  | 0.17           | (-0.52 ; 0.86) | 0.64    | -0.21 | (-0.99 ; 0.58) | 0.60    | 0.03                     | (-0.49 ; 0.54) | 0.92    |
|              |                |          | A/A vs G/G  | -0.57          | (-1.98 ; 0.84) | 0.43    | 0.06  | (-1.46 ; 1.57) | 0.94    | -0.28                    | (-1.31 ; 0.75) | 0.59    |
|              | <i>TAS2R40</i> | rs534126 | T/C vs C/C  | 0.35           | (-0.32 ; 1.02) | 0.31    | -0.36 | (-1.06 ; 0.34) | 0.31    | 0.04                     | (-0.45 ; 0.52) | 0.88    |
|              |                |          | T/T vs C/C  | 1.44           | (0.19 ; 2.68)  | 0.02    | 0.06  | (-0.98 ; 1.11) | 0.91    | 0.73                     | (-0.08 ; 1.54) | 0.08    |
|              | <i>TAS2R60</i> | rs459503 | T/C vs C/C  | -0.46          | (-1.16 ; 0.23) | 0.19    | 0.12  | (-0.59 ; 0.82) | 0.74    | -0.19                    | (-0.69 ; 0.31) | 0.45    |
|              |                |          | T/T vs C/C  | -0.30          | (-1.36 ; 0.76) | 0.58    | 0.31  | (-0.71 ; 1.33) | 0.56    | -0.02                    | (-0.75 ; 0.72) | 0.97    |

|                |          |                          |               |                                  |              |                |                                  |              |                |                                  |              |
|----------------|----------|--------------------------|---------------|----------------------------------|--------------|----------------|----------------------------------|--------------|----------------|----------------------------------|--------------|
| <i>TAS2R41</i> | rs102787 | T/C vs C/C<br>T/T vs C/C | -0.14<br>0.59 | (-0.81 ; 0.54)<br>(-0.69 ; 1.88) | 0.70<br>0.37 | -0.13<br>-0.05 | (-0.86 ; 0.61)<br>(-1.11 ; 1.01) | 0.73<br>0.93 | -0.14<br>0.22  | (-0.64 ; 0.36)<br>(-0.60 ; 1.05) | 0.58<br>0.60 |
| <b>Chr.12</b>  |          |                          |               |                                  |              |                |                                  |              |                |                                  |              |
| <i>TAS2R7</i>  | rs258835 | G/A vs G/G<br>A/A vs G/G | 0.16<br>1.45  | (-0.53 ; 0.85)<br>(0.02 ; 2.89)  | 0.65<br>0.05 | 0.45<br>0.33   | (-0.44 ; 1.34)<br>(-0.74 ; 1.39) | 0.32<br>0.55 | 0.28<br>0.70   | (-0.26 ; 0.83)<br>(-0.15 ; 1.56) | 0.31<br>0.11 |
| <i>TAS2R9</i>  | rs374184 | T/C vs C/C<br>T/T vs C/C | 0.35<br>0.78  | (-0.37 ; 1.07)<br>(-0.17 ; 1.72) | 0.33<br>0.11 | -0.24<br>-1.30 | (-1.03 ; 0.55)<br>(-2.63 ; 0.04) | 0.55<br>0.06 | 0.12<br>0.15   | (-0.42 ; 0.65)<br>(-0.62 ; 0.91) | 0.67<br>0.71 |
| <i>TAS2R14</i> | rs116101 | G/A vs G/G<br>A/A vs G/G | 0.21<br>0.28  | (-0.47 ; 0.88)<br>(-1.09 ; 1.66) | 0.55<br>0.69 | -0.27<br>-0.66 | (-0.97 ; 0.43)<br>(-1.98 ; 0.67) | 0.45<br>0.33 | 0.00<br>-0.20  | (-0.48 ; 0.49)<br>(-1.16 ; 0.76) | 0.99<br>0.68 |
| <i>TAS2R50</i> | rs137625 | T/C vs C/C<br>T/T vs C/C | 0.29<br>-0.28 | (-0.39 ; 0.97)<br>(-1.51 ; 0.96) | 0.41<br>0.66 | 0.25<br>0.59   | (-0.54 ; 1.04)<br>(-0.47 ; 1.65) | 0.54<br>0.28 | 0.30<br>0.20   | (-0.21 ; 0.81)<br>(-0.61 ; 1.01) | 0.25<br>0.62 |
|                | rs713696 | T/C vs T/T<br>C/C vs T/T | 0.28<br>0.25  | (-0.40 ; 0.97)<br>(-1.20 ; 1.71) | 0.42<br>0.73 | -0.07<br>-0.55 | (-0.79 ; 0.65)<br>(-2.33 ; 1.23) | 0.85<br>0.54 | 0.13<br>-0.07  | (-0.37 ; 0.62)<br>(-1.19 ; 1.04) | 0.61<br>0.90 |
| <i>TAS2R20</i> | rs107724 | G/A vs G/G<br>A/A vs G/G | 0.02<br>-0.58 | (-0.71 ; 0.75)<br>(-1.57 ; 0.41) | 0.96<br>0.25 | -0.45<br>-0.25 | (-1.16 ; 0.25)<br>(-1.28 ; 0.78) | 0.21<br>0.63 | -0.20<br>-0.46 | (-0.71 ; 0.30)<br>(-1.18 ; 0.25) | 0.43<br>0.20 |
| <i>TAS2R19</i> | rs123134 | G/A vs G/G<br>A/A vs G/G | 1.04<br>-0.02 | (0.14 ; 1.94)<br>(-1.03 ; 0.99)  | 0.02<br>0.97 | -0.47<br>-0.81 | (-1.23 ; 0.28)<br>(-1.76 ; 0.15) | 0.22<br>0.10 | 0.23<br>-0.58  | (-0.36 ; 0.81)<br>(-1.26 ; 0.11) | 0.45<br>0.10 |
| <i>TAS2R31</i> | rs108452 | T/C vs T/T<br>C/C vs T/T | 0.44<br>0.91  | (-0.31 ; 1.18)<br>(-1.79 ; 3.61) | 0.25<br>0.51 | 0.06<br>0.07   | (-0.72 ; 0.84)<br>(-1.59 ; 1.72) | 0.89<br>0.94 | 0.28<br>0.40   | (-0.26 ; 0.82)<br>(-1.03 ; 1.83) | 0.31<br>0.58 |
| <i>TAS2R46</i> | rs270838 | G/A vs G/G<br>A/A vs G/G | 0.49<br>0.01  | (-0.28 ; 1.25)<br>(-1.61 ; 1.62) | 0.21<br>0.99 | -0.34<br>0.45  | (-1.05 ; 0.38)<br>(-1.34 ; 2.23) | 0.36<br>0.63 | 0.09<br>0.10   | (-0.44 ; 0.61)<br>(-1.09 ; 1.29) | 0.74<br>0.87 |
| <i>TAS2R30</i> | rs259940 | T/G vs T/T<br>G/G vs T/T | 0.68<br>-0.35 | (-0.19 ; 1.56)<br>(-1.33 ; 0.64) | 0.13<br>0.49 | -0.52<br>-1.24 | (-1.34 ; 0.29)<br>(-2.22 ; 0.27) | 0.21<br>0.01 | 0.09<br>-0.85  | (-0.51 ; 0.69)<br>(-1.54 ; 0.15) | 0.76<br>0.02 |
| <i>TAS2R42</i> | rs502053 | T/C vs C/C<br>T/C vs C/C | 0.19<br>0.82  | (-0.53 ; 0.91)<br>(-0.17 ; 1.8)  | 0.60<br>0.10 | -0.26<br>0.41  | (-0.97 ; 0.46)<br>(-0.75 ; 1.57) | 0.48<br>0.49 | 0.01<br>0.63   | (-0.49 ; 0.52)<br>(-0.11 ; 1.38) | 0.96<br>0.10 |

Supplementary table S4. Associations between the selected polymorphic variants and e astringency.

| Chr.           | Gene           | SNP        | Model       | Czech Republic |                 |                | Italy          |                |                | Czech Republic and Italy |                |                |
|----------------|----------------|------------|-------------|----------------|-----------------|----------------|----------------|----------------|----------------|--------------------------|----------------|----------------|
|                |                |            |             | Coef.          | 95% CI          | P-value        | Coef.          | 95% CI         | P-value        | Coef.                    | 95% CI         | P-value        |
| Chr.1          | <i>TAS1R3</i>  | rs3574481  | T/C vs C/C  | -0.22          | (-1.09 ; 0.66)  | 0.45           | -0.19          | (-1.33 ; 0.95) | 0.58           | -0.14                    | (-0.84 ; 0.57) | 0.36           |
|                | <i>CA6</i>     | rs2274333  | G/A vs A/A  | 0.12           | (-0.57 ; 0.80)  | 0.74           | n.a.           | n.a.           | n.a.           | n.a.                     | n.a.           | n.a.           |
|                |                |            | G/G vs /A/A | -0.59          | (-1.6 ; 0.430)  | 0.26           | n.a.           | n.a.           | n.a.           | n.a.                     | n.a.           | n.a.           |
|                | <i>TAS1R2</i>  | rs4920566  | G/A vs G/G  | 0.29           | (-0.38 ; 0.96)  | 0.40           | n.a.           | n.a.           | n.a.           | n.a.                     | n.a.           | n.a.           |
|                |                |            | A/A vs G/G  | -1.24          | (-1.97 ; -0.50) | <b>0.001</b>   | n.a.           | n.a.           | n.a.           | n.a.                     | n.a.           | n.a.           |
| rs3587411      |                |            | G/A vs A/A  | -0.31          | (-0.91 ; 0.30)  | 0.32           | -0.08          | (-0.83 ; 0.66) | 0.83           | -0.24                    | (-0.71 ; 0.24) | 0.33           |
|                |                | G/G vs A/A | -0.08       | (-1.14 ; 0.98) | 0.88            | 0.80           | (-0.37 ; 1.96) | 0.18           | 0.39           | (-0.40 ; 1.17)           | 0.34           |                |
| Chr.5          | <i>TAS1R1</i>  | rs41467    | T/G vs G/G  | -0.20          | (-0.82 ; 0.42)  | 0.53           | 0.37           | (-0.36 ; 1.10) | 0.32           | 0.04                     | (-0.43 ; 0.52) | 0.86           |
|                |                |            | T/T vs G/G  | 0.34           | (-0.49 ; 1.16)  | 0.42           | 0.14           | (-0.91 ; 1.19) | 0.79           | 0.25                     | (-0.41 ; 0.91) | 0.46           |
| Chr.7          | <i>GNAT3</i>   | rs7792845  | G/A vs G/G  | -0.17          | (-0.77 ; 0.44)  | 0.59           | 0.16           | (-0.63 ; 0.96) | 0.69           | 0.03                     | (-0.46 ; 0.52) | 0.90           |
|                |                |            | A/A vs G/G  | -0.19          | (-1.22 ; 0.85)  | 0.72           | -0.26          | (-1.18 ; 0.67) | 0.59           | -0.25                    | (-0.92 ; 0.42) | 0.47           |
|                | <i>TAS2R16</i> | rs6466849  | A/G vs G/G  | 0.44           | (-0.17 ; 1.06)  | 0.16           | 0.55           | (-0.23 ; 1.33) | 0.17           | 0.49                     | (0.002 ; 0.97) | 0.05           |
|                |                |            | A/A vs G/G  | 0.00           | (-1.58 ; 1.59)  | 1.00           | -2.57          | (-7.60 ; 2.46) | 0.32           | -0.15                    | (-1.71 ; 1.41) | 0.85           |
|                |                |            | rs860170    | G/A vs /A/A    | -0.22           | (-0.83 ; 0.40) | 0.49           | 0.60           | (-0.11 ; 1.31) | 0.10                     | 0.19           | (-0.28 ; 0.66) |
|                |                |            | G/G vs A/A  | -0.58          | (-1.46 ; 0.31)  | 0.20           | -0.63          | (-2.02 ; 0.76) | 0.38           | -0.51                    | (-1.27 ; 0.25) | 0.19           |
|                |                | rs978739   | G/A vs A/A  | 0.52           | (-0.08 ; 1.12)  | 0.09           | 0.33           | (-0.41 ; 1.06) | 0.39           | 0.41                     | (-0.06 ; 0.88) | 0.09           |
|                |                |            | G/G vs A/A  | 0.74           | (-0.16 ; 1.64)  | 0.11           | -0.40          | (-1.72 ; 0.92) | 0.55           | 0.44                     | (-0.31 ; 1.19) | 0.25           |
|                | <i>TAS2R5</i>  | rs2227264  | T/G vs G/G  | -0.44          | (-1.16 ; 0.27)  | 0.23           | 0.58           | (-0.27 ; 1.44) | 0.18           | 0.03                     | (-0.53 ; 0.59) | 0.92           |
|                |                |            | T/T vs G/G  | 0.05           | (-0.74 ; 0.84)  | 0.90           | 0.14           | (-0.84 ; 1.12) | 0.78           | 0.17                     | (-0.45 ; 0.80) | 0.59           |
|                | <i>TAS2R38</i> | rs1024693  | C/T vs C/C  | -0.51          | (-1.27 ; 0.25)  | 0.19           | -0.18          | (-1.01 ; 0.66) | 0.68           | -0.39                    | (-0.96 ; 0.17) | 0.18           |
|                |                |            | T/T vs C/C  | -0.19          | (-1.04 ; 0.65)  | 0.65           | -0.72          | (-1.64 ; 0.20) | 0.13           | -0.47                    | (-1.10 ; 0.15) | 0.14           |
|                |                |            | rs1726866   | T/C vs C/C     | -0.57           | (-1.33 ; 0.19) | 0.14           | -0.16          | (-0.99 ; 0.67) | 0.70                     | -0.41          | (-0.98 ; 0.15) |
|                |                |            | T/C vs C/C  | -0.27          | (-1.11 ; 0.58)  | 0.54           | -0.68          | (-1.60 ; 0.24) | 0.15           | -0.50                    | (-1.13 ; 0.13) | 0.12           |
|                |                | rs713598   | G/C vs C/C  | -0.18          | (-1.01 ; 0.64)  | 0.66           | -0.14          | (-1.02 ; 0.74) | 0.75           | -0.19                    | (-0.79 ; 0.42) | 0.54           |
|                |                |            | G/G vs C/C  | 0.06           | (-0.81 ; 0.94)  | 0.89           | -0.38          | (-1.30 ; 0.55) | 0.43           | -0.18                    | (-0.81 ; 0.46) | 0.59           |
|                | <i>TAS2R39</i> | rs4726600  | G/A vs G/G  | 0.40           | (-0.19 ; 0.99)  | 0.19           | -0.27          | (-1.07 ; 0.54) | 0.51           | 0.13                     | (-0.36 ; 0.62) | 0.60           |
|                |                |            | A/A vs G/G  | 0.57           | (-0.65 ; 1.78)  | 0.36           | -0.55          | (-2.11 ; 1.01) | 0.49           | 0.21                     | (-0.76 ; 1.18) | 0.67           |
|                | <i>TAS2R40</i> | rs534126   | T/C vs C/C  | -0.41          | (-0.99 ; 0.17)  | 0.16           | 0.13           | (-0.59 ; 0.85) | 0.73           | -0.20                    | (-0.66 ; 0.25) | 0.38           |
|                |                |            | T/T vs C/C  | 0.56           | (-0.50 ; 1.62)  | 0.30           | 0.38           | (-0.70 ; 1.46) | 0.49           | 0.46                     | (-0.29 ; 1.22) | 0.23           |
| <i>TAS2R60</i> | rs4595035      | T/C vs C/C | -0.46       | (-1.06 ; 0.14) | 0.13            | 0.37           | (-0.35 ; 1.09) | 0.31           | -0.06          | (-0.53 ; 0.41)           | 0.80           |                |
|                |                | T/T vs C/C | -0.13       | (-1.04 ; 0.78) | 0.78            | 0.37           | (-0.67 ; 1.41) | 0.49           | 0.10           | (-0.59 ; 0.79)           | 0.78           |                |
| <i>TAS2R41</i> | rs1027872      | T/C vs C/C | -0.05       | (-0.64 ; 0.54) | 0.86            | -0.31          | (-1.07 ; 0.45) | 0.43           | -0.19          | (-0.67 ; 0.28)           | 0.42           |                |



|                |           |            | T/T vs C/C | -0.35          | (-1.47 ; 0.77) | 0.54  | 0.11           | (-0.99 ; 1.22) | 0.84  | -0.10          | (-0.89 ; 0.69) | 0.81 |
|----------------|-----------|------------|------------|----------------|----------------|-------|----------------|----------------|-------|----------------|----------------|------|
| <b>Chr.12</b>  |           |            |            |                |                |       |                |                |       |                |                |      |
| <i>TAS2R7</i>  | rs2588350 | G/A vs G/G | 0.62       | (0.03 ; 1.20)  | 0.04           | 0.70  | (-0.20 ; 1.60) | 0.13           | 0.68  | (0.18 ; 1.18)  | 0.01           |      |
|                |           | A/A vs G/G | 1.40       | (0.18 ; 2.62)  | 0.02           | 0.75  | (-0.34 ; 1.84) | 0.18           | 0.99  | (0.20 ; 1.78)  | 0.01           |      |
| <i>TAS2R9</i>  | rs3741845 | T/C vs C/C | 0.39       | (-0.23 ; 1.01) | 0.22           | -0.05 | (-0.87 ; 0.77) | 0.91           | 0.23  | (-0.28 ; 0.73) | 0.38           |      |
|                |           | T/T vs C/C | 0.35       | (-0.47 ; 1.17) | 0.40           | -0.19 | (-1.57 ; 1.19) | 0.79           | 0.13  | (-0.59 ; 0.84) | 0.73           |      |
| <i>TAS2R14</i> | rs1161010 | G/A vs G/G | 0.29       | (-0.29 ; 0.87) | 0.33           | 0.07  | (-0.65 ; 0.79) | 0.85           | 0.24  | (-0.22 ; 0.69) | 0.31           |      |
|                |           | A/A vs G/G | -0.53      | (-1.71 ; 0.66) | 0.38           | 0.00  | (-1.37 ; 1.37) | 1.00           | -0.33 | (-1.24 ; 0.57) | 0.47           |      |
| <i>TAS2R50</i> | rs1376251 | T/C vs C/C | -0.05      | (-0.64 ; 0.54) | 0.87           | 0.39  | (-0.42 ; 1.20) | 0.35           | 0.14  | (-0.34 ; 0.62) | 0.56           |      |
|                |           | T/T vs C/C | -0.93      | (-1.97 ; 0.12) | 0.08           | 0.08  | (-1.01 ; 1.17) | 0.88           | -0.46 | (-1.21 ; 0.29) | 0.23           |      |
|                | rs7136962 | T/C vs T/T | 0.20       | (-0.39 ; 0.79) | 0.51           | -0.18 | (-0.91 ; 0.56) | 0.64           | 0.06  | (-0.41 ; 0.53) | 0.80           |      |
|                |           | C/C vs T/T | -0.53      | (-1.78 ; 0.72) | 0.41           | 0.29  | (-1.55 ; 2.12) | 0.76           | -0.26 | (-1.31 ; 0.8)  | 0.63           |      |
| <i>TAS2R20</i> | rs1077240 | G/A vs G/G | -0.12      | (-0.75 ; 0.50) | 0.70           | -0.32 | (-1.04 ; 0.41) | 0.39           | -0.23 | (-0.71 ; 0.25) | 0.35           |      |
|                |           | A/A vs G/G | 0.73       | (-0.12 ; 1.58) | 0.09           | 0.45  | (-0.61 ; 1.51) | 0.41           | 0.58  | (-0.09 ; 1.25) | 0.09           |      |
| <i>TAS2R19</i> | rs1231346 | G/A vs G/G | 0.56       | (-0.22 ; 1.34) | 0.16           | -0.27 | (-1.05 ; 0.50) | 0.49           | 0.11  | (-0.44 ; 0.66) | 0.69           |      |
|                |           | A/A vs G/G | -0.03      | (-0.90 ; 0.85) | 0.95           | -0.92 | (-1.90 ; 0.05) | 0.06           | -0.52 | (-1.17 ; 0.12) | 0.11           |      |
| <i>TAS2R31</i> | rs1084529 | T/C vs T/T | 0.53       | (-0.11 ; 1.18) | 0.10           | 0.26  | (-0.53 ; 1.05) | 0.52           | 0.40  | (-0.10 ; 0.91) | 0.12           |      |
|                |           | C/C vs T/T | 1.50       | (-0.83 ; 3.83) | 0.21           | 0.44  | (-1.23 ; 2.12) | 0.61           | 0.87  | (-0.47 ; 2.21) | 0.20           |      |
| <i>TAS2R46</i> | rs2708381 | G/A vs G/G | 0.34       | (-0.31 ; 0.98) | 0.31           | -0.20 | (-0.93 ; 0.54) | 0.60           | 0.10  | (-0.39 ; 0.59) | 0.68           |      |
|                |           | A/A vs G/G | -0.75      | (-2.12 ; 0.62) | 0.29           | 0.05  | (-1.78 ; 1.87) | 0.96           | -0.47 | (-1.58 ; 0.65) | 0.41           |      |
| <i>TAS2R30</i> | rs2599404 | T/G vs T/T | 0.61       | (-0.15 ; 1.36) | 0.12           | -0.08 | (-0.92 ; 0.76) | 0.86           | 0.26  | (-0.30 ; 0.82) | 0.36           |      |
|                |           | G/G vs T/T | 0.08       | (-0.77 ; 0.93) | 0.86           | -0.88 | (-1.89 ; 0.12) | 0.08           | -0.40 | (-1.05 ; 0.24) | 0.22           |      |
| <i>TAS2R42</i> | rs5020531 | T/C vs C/C | 0.36       | (-0.26 ; 0.98) | 0.26           | 0.67  | (-0.05 ; 1.40) | 0.07           | 0.57  | (0.09 ; 1.05)  | 0.018          |      |
|                |           | T/C vs C/C | 0.31       | (-0.54 ; 1.16) | 0.48           | 0.44  | (-0.74 ; 1.62) | 0.46           | 0.40  | (-0.30 ; 1.09) | 0.27           |      |

**Supplementary table S5. Genes and SNPs selected in the study**

| <b>Chr.</b>   | <b>Gene</b>    | <b>SNPs</b> | <b>Alleles</b> | <b>Most common annotation</b> |
|---------------|----------------|-------------|----------------|-------------------------------|
| <b>Chr. 1</b> | <i>TAS1R3</i>  | rs35744813  | T/C            | nearGene-5                    |
|               | <i>CA6</i>     | rs2274333   | G/A            | missense                      |
|               | <i>TAS1R2</i>  | rs4920566   | G/A            | intron region                 |
|               | <i>TAS1R2</i>  | rs35874116  | G/A            | missense                      |
| <b>Chr. 5</b> | <i>TAS2R1</i>  | rs41467     | T/G            | non-coding                    |
|               | <i>TAS2R1</i>  | rs2234233   | T/C            | missense R206W                |
| <b>Chr. 7</b> | <i>GNAT3</i>   | rs7792845   | G/A            | closer to gene                |
|               | <i>TAS2R16</i> | rs6466849   | A/G            | non-coding                    |
|               | <i>TAS2R16</i> | rs860170    | G/A            | missense H222R                |
|               | <i>TAS2R16</i> | rs978739    | G/A            | non-coding                    |
|               | <i>TAS2R5</i>  | rs2227264   | T/G            | missense S26I                 |
|               | <i>TAS2R38</i> | rs10246939  | C/T            | missense I296V                |
|               | <i>TAS2R38</i> | rs1726866   | T/C            | missense V262A                |
|               | <i>TAS2R38</i> | rs713598    | G/C            | missense A49P                 |
|               | <i>TAS2R39</i> | rs4726600   | G/A            | non-coding                    |
|               | <i>TAS2R40</i> | rs534126    | T/C            | non-coding                    |
|               | <i>TAS2R60</i> | rs4595035   | T/C            | synonymous R310R              |
|               | <i>TAS2R41</i> | rs10278721  | T/C            | missense P127L                |
| <b>Chr.12</b> | <i>TAS2R7</i>  | rs2588350   | G/A            | non-coding                    |
|               | <i>TAS2R9</i>  | rs3741845   | T/C            | missense V187A                |
|               | <i>TAS2R14</i> | rs11610105  | G/A            | non-coding                    |
|               | <i>TAS2R50</i> | rs1376251   | T/C            | missense C203Y                |
|               | <i>TAS2R50</i> | rs7136962   | T/C            | nearGene-5                    |
|               | <i>TAS2R20</i> | rs10772408  | G/A            | non-coding                    |
|               | <i>TAS2R19</i> | rs12313469  | G/A            | cds-synon                     |
|               | <i>TAS2R31</i> | rs10845296  | T/C            | non-coding                    |
|               | <i>TAS2R46</i> | rs2708381   | G/A            | nonsense                      |
|               | <i>TAS2R30</i> | rs2599404   | T/G            | missense F252L                |
|               | <i>TAS2R42</i> | rs5020531   | T/C            | missense F196S                |
